# Supplementary material for: Raman spectra and defect chemical characteristics of Sr(Ti,Fe)O3−y solid solution of bulk pellets vs. thin films
Source: Royal Society of Chemistry journal article supplement (doi:10.1039/d3ta04818g), 2023-01-01
Supplement: d3ta04818g1.pdf [file d3ta04818g1.pdf]

## Supporting Information to Raman Spectra and Defect Chemical Characteristics of Sr(Ti,Fe)O<sub>3-y</sub> Solid Solution of Bulk Pellets vs. Thin Films

Eva Sediva<sup>1,2,3</sup> and Jennifer L.M. Rupp<sup>\*1,2,4</sup>

1 Electrochemical Materials, Department of Materials Science and Engineering, Massachusetts Institute of Technology, 77 Massachusetts Av., MA, 02139, USA

2 Electrochemical Materials, Department of Electrical Engineering and Computer Science, Massachusetts Institute of Technology, 77 Massachusetts Av., Cambridge MA, 02139, USA

3 ETHZ Department of Materials, Hönggerberggring 64, 8093, Zürich, Switzerland

4 Department of Chemistry, Technical University of Munich, 85748 Garching, Germany

\*jrupp@mit.edu

### Group theoretical analysis of the different phases of SrFeO<sub>3-y</sub>

Table 1: Mechanical representations of the different SrFeO<sub>3-y</sub> phases

|                      |                                                 |                                       |
|----------------------|-------------------------------------------------|---------------------------------------|
| Cubic phase          | SrFeO <sub>3</sub>                              | <i>Pm3m</i>                           |
|                      | Raman                                           | none                                  |
| Tetragonal phase     | Sr <sub>8</sub> Fe <sub>8</sub> O <sub>23</sub> | <i>I4/mmm</i>                         |
|                      | Raman                                           | $7A_{1g} + 7B_{1g} + 6B_{2g} + 11E_g$ |
| Orthorhombic phase   | Sr <sub>4</sub> Fe <sub>4</sub> O <sub>11</sub> | <i>Cmmm</i>                           |
|                      | Raman                                           | $6A_g + 6B_{1g} + 5B_{2g} + 4B_{3g}$  |
| Brownmillerite phase | Sr <sub>2</sub> Fe <sub>2</sub> O <sub>5</sub>  | <i>Imma</i>                           |
|                      | Raman                                           | $13A_1 + 12A_2 + 12B_1 + 14B_2$       |

## XRD patterns of the thin films and bulk pellets

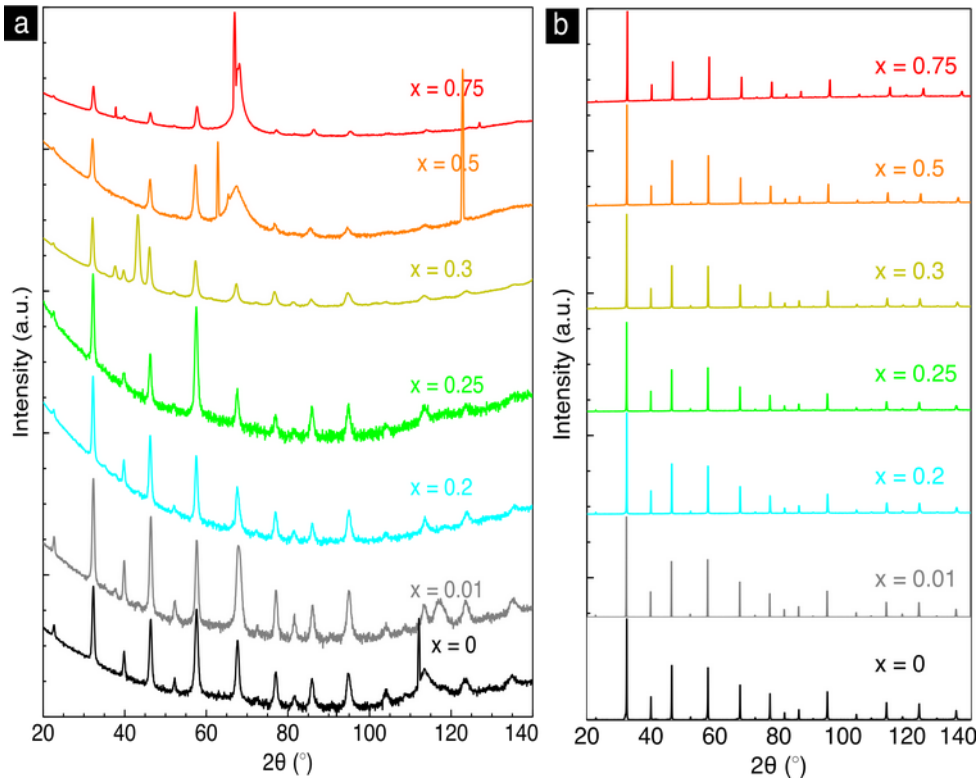

Figure S1: XRD patterns of the  $\text{SrTi}_{1-x}\text{Fe}_x\text{O}_{3-y}$  thin films grown on sapphire (a) and the bulk pellets (b) for different  $x$ .

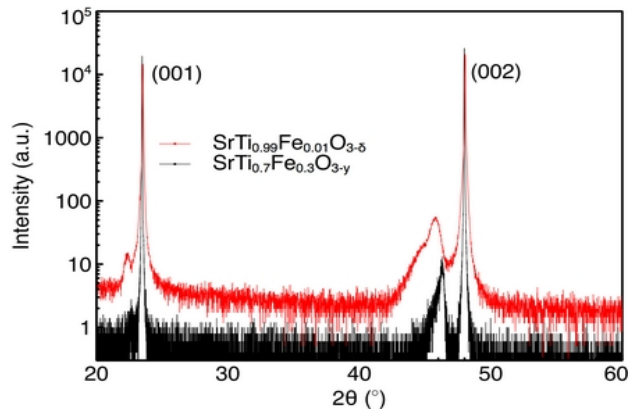

Figure S2: XRD pattern of the oriented thin films grown on  $\text{LaAlO}_3$ .
